# The cortical reaction and development of activation competence in mammalian oocytes

**Tom Ducibella**

Departments of Obstetrics/Gynecology and Anatomy & Cellular Biology, Tufts University School of Medicine, and New England Medical Center, Boston, MA, USA

## TABLE OF CONTENTS

|                                                                          |    |
|--------------------------------------------------------------------------|----|
| Cortical granules                                                        | 29 |
| Mechanism of the cortical reaction                                       | 30 |
| Development of competence to undergo CG release                          | 32 |
| Cytoplasmic maturation and human IVF                                     | 34 |
| Cytoplasmic response after ICSI                                          | 36 |
| A developmental temporal window for normal egg CG release and activation | 37 |
| Acknowledgements                                                         | 38 |
| References                                                               | 38 |

**Blocks to polyspermic fertilization are necessary to prevent the incorporation of two sperm nuclei into a zygote's genome, which would result in abnormal development. Many mammalian eggs utilize both an extracellular zona pellucida block to polyspermy and a plasma membrane block. Although little is known about the plasma membrane block in mammals, fertilization results in zona glycoprotein modifications caused by enzymes released by the egg and its cortical granules (CG). This article reviews other recent investigations demonstrating that the oocyte's ability to cause CG release and the block to polyspermy develops near the time of ovulation. The development of normal 'activation competence' is likely to involve preovulatory changes in the oocyte's ability to signal the release of intracellular calcium as well as to respond to this calcium increase, resulting in CG exocytosis. Because normal activation competence appears to have a brief temporal window after oocyte meiotic maturation is resumed and since the oocytes are collected at various stages in assisted reproductive procedures, these studies are relevant to optimizing clinical success.**

*Key words:* activation competence/calcium/cortical granules/in-vitro fertilization/oocyte maturation

## Cortical granules

The blocks to polyspermic fertilization (Jaffe and Gould, 1985) are necessary to prevent the incorporation of two sperm nuclei into the zygote's genome that would result in abnormal development. In most mammals, dispermic fertilization is usually prevented by a combination of the fertilized egg's blocks to polyspermy and low sperm number in the Fallopian tube. However, >1% of natural human conceptions (Boue *et al.*, 1975; Golbus, 1981) and ~10% of those from in-vitro fertilization (IVF) (Hammitt *et al.*, 1993) result in triploid embryonic abortions, the majority from dispermic fertilization (Beatty, 1978; Jacobs *et al.*, 1978; Kola and Trounson, 1989). Currently, reproductive technologies (e.g. intrauterine insemination, gamete intra-Fallopian transfer, and IVF) are used to treat infertility, produce needed domestic animals, or help save endangered species. However, much higher sperm concentrations are used than occur in the oviduct during natural conception (in the case of IVF, 100–1000 times higher) and the rate of polyspermy is increased. At the other extreme, only a single spermatozoon is used in intracytoplasmic sperm injection (ICSI) and the normal process of initial spermatozoon–egg interaction appears to be bypassed.

Many mammalian eggs utilize an extracellular zona pellucida (ZP) block to polyspermy and a plasma membrane block, the relative contributions of which vary in different species (Yanagimachi, 1994). In biochemical terms, little is known about the plasma membrane block in mammals (Wolf, 1981) and a possible role for cortical granules (CG) remains unresolved (Yanagimachi, 1994). The membrane depolarization block to polyspermy found in other animal eggs has not been detected in studies of mammalian eggs (Jaffe and Gould, 1985).

Within 10 min of fertilization (Lee *et al.*, 1988; Stewart-Savage and Bavister, 1991; Kline and Stewart-Savage,

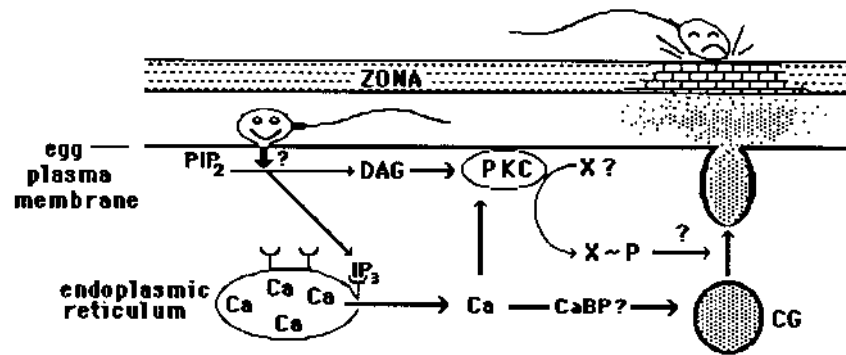

**Figure 1.** Working model for the mechanism of the cortical reaction in mammalian eggs. The release of egg intracellular Ca continues to be the most important known messenger involved in cortical granule (CG) release, although its downstream targets that ultimately cause exocytosis remain to be firmly established. As described in the text, this model has been compiled from experimental data from many laboratories. See text for abbreviations. PIP<sub>2</sub> = inositol phosphate; DAG = diacylglycerol; PKC = protein kinase C; X = hypothetical protein; IP<sub>3</sub> = inositol 1,4,5-trisphosphate; CaBP = calcium-binding proteins

1994), the cortical reaction releases CG enzymes that change the ZP, resulting in the important extracellular ZP block to polyspermy found in many animals (Wolf, 1981) and humans (Kola and Trounson, 1989). Fertilization-associated biochemical modifications of one or more ZP glycoproteins (designated ZP1, ZP2 and ZP3) have been reviewed extensively in animals (Wassarman, 1990; Bleil, 1991; Dunbar *et al.*, 1991; Liang and Dean, 1993), but much less is known in humans (Shabanowitz and O'Rand, 1988; Ducibella *et al.*, 1995; Moos *et al.*, 1995).

In sea urchin, amphibian and mammalian eggs, CG are cortically localized, 0.1–1  $\mu\text{m}$  diameter, membrane-bound, secretory granules whose contents include enzymes that modify and remove sperm receptors from the extracellular investments of eggs upon fertilization (reviewed by Schuel, 1985; Cran and Esper, 1990; Ducibella, 1991; Hoodbhoy and Talbot, 1994). In the mouse, the fertilization-associated release of CG enzymes changes the ZP: the ZP2 polypeptide is cleaved to ZP2<sub>f</sub> (although still held together by intrachain disulphide bonds); ZP3, while apparently not cleaved, undergoes a carbohydrate modification resulting in a loss of sperm-binding activity and an inability to induce the acrosome reaction (Wassarman, 1990; Miller *et al.*, 1993). Studies of factors released by activated eggs suggest that CG contain a trypsin-like enzyme activity (Gwatkin *et al.*, 1973; Wolf and Hamada, 1977), ovoperoxidase activity (Gulyas and Schmel, 1980), a 21–34  $\times 10^{-3}$   $M_r$  proteinase that cleaves ZP2 (Moller and Wassarman, 1989), a 75  $\times 10^{-3}$   $M_r$  protein of unknown function (Pierce *et al.*, 1990, 1992) and an *N*-acetylglucosaminidase activity that may be responsible for modification of ZP3 (Miller *et al.*, 1993). The 75  $\times 10^{-3}$   $M_r$  protein and glycosaminidase have been localized to intact CG. These important studies suggest that mammalian CG contain several proteins with different activities. However, future research remains to

establish a complete biochemical inventory of CG contents and how they individually and collectively participate at a molecular level in the blocks to polyspermy.

### Mechanism of the cortical reaction

In sea urchin and amphibian eggs (reviewed by Turner and Jaffe, 1989; Nuccitelli, 1991; Bement, 1992), the biochemical pathways involved in activating CG release have been studied and mammalian eggs appear to be similar although not identical to those of marine eggs (reviewed in Miyazaki *et al.*, 1993). Figure 1 should be considered a working model for mammalian CG release. Research on egg activation pathways is proceeding rapidly and, at the time of writing, there are varying amounts of evidence for different parts of this mechanism. Egg activation may be initiated by a sperm receptor-coupled G-protein pathway (Kline *et al.*, 1988; Miyazaki *et al.*, 1990; Williams *et al.*, 1992; Moore *et al.*, 1993), or by spermatozoon–egg fusion followed by the passage of a sperm factor into the egg cytoplasm (Dale *et al.*, 1985; Stice and Robl, 1990; Swann, 1990, 1994), or a combination of several mechanisms. Downstream of these fascinating unresolved early events (Whitaker and Swann, 1993), the elevation of second messengers in the inositol phosphate (PIP<sub>2</sub>) cascade leads to the release of intracellular calcium (Clapham, 1995) that is necessary for CG exocytosis.

### Inositol 1,4,5-trisphosphate

In sea urchin eggs, fertilization results in a stimulation of PIP<sub>2</sub> turnover and the production of second messengers—inositol 1,4,5-trisphosphate (IP<sub>3</sub>) and diacylglycerol (DAG) (Ciapa *et al.*, 1992). PIP<sub>2</sub> appears to play a role in the amount of Ca released in activated amphibian eggs

(Larabell and Nuccitelli, 1992). In mammalian eggs, elevated IP<sub>3</sub> causes the release of egg intracellular calcium (Ca) (reviewed in Miyazaki *et al.*, 1993), which is required for CG release. Microinjection of IP<sub>3</sub> causes Ca transients (Miyazaki *et al.*, 1990; Kline and Kline, 1994), CG secretion (Cran *et al.*, 1988) and the ZP2 modification (Kurasawa *et al.*, 1989; Ducibella *et al.*, 1993). Also, an antibody to the IP<sub>3</sub> receptor inhibits sperm-induced Ca transients (Miyazaki *et al.*, 1992) and ZP modifications as well as later events in egg activation (Xu *et al.*, 1994). To the best of our current knowledge, at fertilization, Ca release appears to be mediated principally through IP<sub>3</sub> in mammalian eggs (Miyazaki *et al.*, 1993). Although functional ryanodine receptors (Ayabe *et al.*, 1995) and ryanodine-sensitive Ca stores (Swann, 1992) are present in mouse eggs, ryanodine receptor-mediated Ca release is not required for mouse egg activation (Kline and Kline, 1994; Ayabe *et al.*, 1995).

### Calcium

Many studies with marine eggs and isolated cortical preparations from sea urchin eggs (reviewed by Trimmer and Vacquier, 1986) demonstrate that Ca is the most important known positive messenger for CG release. The increase in intracellular free Ca during mammalian fertilization appears to be driven principally by an IP<sub>3</sub>-mediated pathway rather than a cADP-ribose, ryanodine receptor mechanism (Miyazaki *et al.*, 1993; Kline and Kline, 1994). Blocking Ca elevation with injected Ca buffers prevents CG release in mouse eggs (Kline and Kline, 1992a). In hamsters (Steinhardt *et al.*, 1974) and mice (Ducibella *et al.*, 1990a,b), the egg's endogenous Ca stores are sufficient to stimulate CG release.

### Diacylglycerol

DAG is generated early during sea urchin fertilization (Ciapa and Whitaker, 1986). In amphibian eggs, protein kinase C (PKC) agonists cause egg activation events (Bement and Capco, 1989) and PKC appears to act downstream of Ca (Bement and Capco, 1990). Mouse eggs treated with exogenous phorbol esters or DAG (both protein kinase C agonists) undergo CG release (Ducibella *et al.*, 1993), ZP2 modification (Endo *et al.*, 1987a,b) and other ZP changes (Colonna *et al.*, 1989), all of which are observed after fertilization. Both Ca and DAG may be involved in activating normal CG release because phorbol esters alone do not cause a complete zona reaction (Endo *et al.*, 1987b).

### Protein kinase C

Fertilized sea urchin eggs activate phospholipid-dependent PKC (see above), and PKC inhibition down-regulates

fertilization responses (Shen and Buck, 1990). In mammalian eggs, Ca or DAG stimulates egg activation and PKC inhibitors down-regulate activation events (Gallicano *et al.*, 1993). In hamster eggs, PKC and its catalytic subunit are involved in cytoplasmic reorganization in activated eggs (Gallicano *et al.*, 1995). In other secretory cells, PKC is involved in granule release (Trifaro *et al.*, 1992; Burgoyne and Morgan, 1993) and may act by phosphorylating a hypothetical protein (X in Figure 1), stimulating exocytosis. There remain several unanswered questions. It is not known whether PKC phosphorylates another kinase, a messenger or a structural protein in the cytoskeleton or secretory granule membrane that is involved in CG release. Equally importantly, it has not been demonstrated in mammalian eggs that fertilization causes PKC-induced CG release. The effects of PKC inhibition on CG release in mammalian eggs undergoing fertilization have not been reported. The critical question is what signalling pathways does the spermatozoon activate at fertilization.

### Calcium-binding proteins

At present, there are a large number of potential calcium-binding proteins (CaBP) (other than PKC) that may be involved in CG exocytosis. These include regulatory molecules, like calmodulin, and structural proteins involved in modulating the cytoskeleton. Like other secretory cells, the mammalian egg cortex contains a layer of filamentous actin (Longo and Chen, 1985) in which mammalian CG are likely to be embedded. The final translocation of CG to the plasma membrane at fertilization may require a modification, shortening, or depolymerization of filaments. In other cell types, these changes are often mediated by a combination of actin-binding proteins and second messengers. At least one of these proteins, gelsolin, acts as an actin-severing protein at ~1 μM Ca (Yin *et al.*, 1990), which is similar to the cytosolic Ca concentration at fertilization. However, gelsolin severing activity is also down-regulated by polyphosphoinositides (Janmey and Stossel, 1987), which makes their analysis at fertilization interesting and challenging.

A role for calmodulin, a Ca-dependent signalling protein, in promoting CG exocytosis is likely from studies of eggs and secretory cells. In sea urchin eggs, antibodies to calmodulin (Steinhardt and Alderton, 1982) and the anti-calmodulin antagonist trifluoroperazine (Baker and Whitaker, 1979), inhibited CG fusion with the plasma membrane in in-vitro studies. In other cells, granule secretion is sensitive to calmodulin inhibitors and antibodies, and calmodulin binds to secretory granule membranes (reviewed in Trifaro *et al.*, 1992).

## Development of competence to undergo CG release

In many animals, when immature eggs are fertilized, they fail to undergo CG release and increased sperm penetration of the egg's extracellular coat and/or polyspermy are observed (sea urchins: Longo, 1978; amphibians: Elinson, 1986, mammals: Cherr and Ducibella, 1990). The most outstanding example is in the pig: when human chorionic gonadotrophin was given 2 days early in the oestrous cycle, 92% of the oocytes were polyspermic from in-vivo fertilization of meiotically immature oocytes (Hunter *et al.*, 1976). Both mouse (Ducibella and Buetow, 1994) and human (Van Blerkom *et al.*, 1994) germinal vesicle (GV)-stage oocytes undergo fertilization *in vitro*, but CG release is, respectively, undetectable or severely reduced. Because CG enzymes are responsible for an extracellular block to polyspermy, increased sperm penetration of immature eggs is likely to be due to a failure of normal CG release. The inability of mouse pre-ovulatory oocytes to undergo CG release and establish the ZP block to polyspermy is of increasing interest clinically, because human and domestic animal IVF procedures collect oocytes directly from their follicles prior to ovulation.

The incompetence of fertilized immature oocytes to undergo a normal ZP block could, in theory, be due to an insufficient number of CG, their distance from the plasma membrane, the structure of the oocyte cortex, or an incompetent signalling pathway for CG exocytosis. Before meiotic maturation, CG are absent from the cortex in marsupial (Mate *et al.*, 1992) and pig (Cran and Cheng, 1985) oocytes and during maturation undergo substantial migration into the cortex. In contrast, human CG are present in the cortex of GV and metaphase I stage oocytes, and during in-vitro culture their number may increase (Suzuki *et al.*, 1981; Sathanathan and Trounson, 1982), although this has not been quantified. In quantitative studies, mouse GV-stage oocytes from antral pre-ovulatory follicles have no deficiency in the number or spatial location of CG compared to ovulated metaphase II eggs (Ducibella *et al.*, 1988a,b). The latter studies indicate that CG number and CG distance from the plasma membrane cannot account for the incompetence of full-grown GV-stage mouse oocytes to undergo CG exocytosis.

Because of the central importance of the explosive release of intracellular Ca to CG exocytosis and egg activation in general at fertilization (Jaffe, 1985), maturation-associated regulation of Ca release from cytoplasmic stores is likely to be involved in the development of competence to undergo CG release. Recent evidence indicates that the Ca storehouse is the egg's endoplasmic reticulum (ER). Studies in sea urchin and amphibian oocytes demonstrate that the ER is a

continuous network in the cortex, closely associated with CG, and can store as well as release intracellular Ca (see Nuccitelli *et al.*, 1989; Terasaki and Sardet, 1991; Jaffe and Terasaki, 1994; and references therein). Direct and indirect localization studies of the distribution of Ca binding and regulatory proteins are consistent with their localization in the ER. These include the IP<sub>3</sub> receptor, a ryanodine receptor/Ca release channel, calsequestrin and calreticulin (Henson *et al.*, 1989, 1990; McPherson *et al.*, 1992; Kume *et al.*, 1993; Parys *et al.*, 1994; Ayabe *et al.*, 1995; Shiraishi *et al.*, 1995). IP<sub>3</sub> induces Ca release principally from the ER in studies of oocyte cytoplasmic fractions (Han and Nuccitelli, 1990). During meiotic maturation in amphibian (Campanella *et al.*, 1984; Charbonneau and Grey, 1984) and mammalian (Ducibella *et al.*, 1988b; Mehlmann, *et al.*, 1995; Shiraishi *et al.*, 1995) oocytes, the cortical ER appears to increase in quantity or in proximity to CG. Many Ca regulatory proteins (above) also relocate with the ER to the oocyte cortex during maturation. The ER and IP<sub>3</sub> receptor relocation during maturation would provide the optimal arrangement for CG release: the stimulus (spermatozoa), the response machinery (e.g. the ER), and effectors for the zona block (CG) are spatially colocalized. It is noteworthy that relatively little cortical ER is observed in some marine eggs that do not undergo CG release (Luttmer and Longo, 1985). In secretory cells using intracellular Ca as a second messenger, the importance of the spatial organization of stored Ca (and IP<sub>3</sub> receptors because they may colocalize) has been emphasized (Cheek, 1989).

The development of competence to undergo CG release (as well as egg activation) is likely to depend on not only the position of Ca stores and Ca regulatory proteins, but also their concentration and functional status. In mature mammalian eggs, intracellular Ca release is primarily controlled by a mechanism involving IP<sub>3</sub>-induced release (Miyazaki *et al.*, 1993; Kline and Kline, 1994; Ayabe *et al.*, 1995; Miyazaki, 1995) as described previously. In theory, this release mechanism could be developmentally gated at many points in the egg's signalling pathway, e.g. the production/elevation of IP<sub>3</sub>, the IP<sub>3</sub>-responsive Ca-release mechanism and downstream Ca-dependent targets. These categories could be further subdivided. For example, the Ca-release mechanism can be affected by the concentration of cytosolic and luminal (ER) Ca, and the status of the IP<sub>3</sub> receptor (Berridge, 1993; Marshall and Taylor, 1993). Receptor activity, in turn, can be modulated by its phosphorylation state (Supattapone *et al.*, 1988), isoform (Furuichi *et al.*, 1989; Sudhof *et al.*, 1991) and number. A tetramer of four receptors is thought to represent the IP<sub>3</sub>-sensitive ER release channel (Wagenknecht *et al.*, 1989; Maeda *et al.*, 1990). Isolation of the IP<sub>3</sub> receptor and modulation of its activity by cytosolic Ca have been reported in amphibian eggs (Parys *et al.*, 1992), whose large



size is advantageous. Investigating maturation-associated changes in this elaborate IP<sub>3</sub> receptor-ER 'control centre' for Ca release will serve as an interesting, if initially daunting, challenge. The groundwork has been laid by studies demonstrating that oocytes acquire the ability to undergo full Ca release at the end of maturation (Chiba *et al.*, 1990; Fujiwara *et al.*, 1993; Mehlmann and Kline, 1994).

Mouse oocyte maturation studies indicate that the signalling pathways involved in CG release are not fully developed until metaphase II. Unlike metaphase II eggs, GV-stage oocytes do not undergo CG release in response to Ca ionophore in the absence of extracellular Ca (Ducibella *et al.*, 1990a,c). In this situation, the oocyte must rely on its own intracellular Ca stores that appear to be responsible for the first Ca transient at fertilization. Physiological agonists (spermatozoa or IP<sub>3</sub>) do not cause CG release or the ZP block in GV-stage oocytes (Ducibella *et al.*, 1993; Ducibella and Buetow, 1994). In contrast, PKC agonists cause a similar extent of CG release in GV and metaphase II stages, indicating that the final step(s) in exocytosis–CG fusion with the plasma membrane is not deficient in oocytes before metaphase II (Ducibella *et al.*, 1993). One interpretation of these studies is that there may be a deficiency in the normal process of Ca release that is supported by other investigations. After IP<sub>3</sub> injection or monospermic fertilization, GV-stage oocytes of starfish (Chiba *et al.*, 1990), mice (Mehlmann and Kline, 1994) and hamsters (Fujiwara *et al.*, 1993) do not elevate Ca to the same extent as their mature egg counterparts. Maturation-associated changes in the functional status of the IP<sub>3</sub> receptor have been proposed to account for the development of the ability to elevate Ca to normal intracellular concentrations by metaphase II (Chiba *et al.*, 1990). IP<sub>3</sub>-induced regenerative, propagating Ca release, which is important in spreading a wave of Ca release in metaphase II eggs, is not as well developed in GV-stage oocytes (Fujiwara *et al.*, 1993; Mehlmann and Kline, 1994). Also, it has been reported that between the GV and metaphase II stages, there may be a 3- to 4-fold increase in the amount of ionomycin-inducible Ca release (Tombes *et al.*, 1992).

Thus, one working hypothesis is that GV-stage oocytes are deficient in an early Ca elevation step in the CG exocytosis pathway, but not in the proposed late PKC-dependent step (see Figure 1). However, it is not known if all Ca-dependent effectors involved in CG release are present and fully functional. Another (not necessarily competing) hypothesis is that these effectors develop during maturation, perhaps to minimize spontaneous CG release during the long life of oocytes in their follicles, just as capacitation potentiates the spermatozoon's ability to undergo the acrosome reaction. These studies will require the identification of CaBP involved in CG exocytosis.

During normal meiotic maturation, mouse oocytes acquire the ability to undergo CG exocytosis in three phases (Figure 2A and B): incompetence (GV stage), localized CG release (from GV to metaphase I), and normal global release (metaphase II). Detailed quantitative studies indicate that the percentage of CG loss, location of release, time course of CG release, and sensitivity to thimerosal were all altered in oocytes fertilized before metaphase II (Ducibella and Buetow, 1994). Although thimerosal is thought to increase the sensitivity of the IP<sub>3</sub> receptor, it failed to augment CG release in unfertilized and fertilized metaphase I oocytes at a concentration that augmented CG release in both of these groups of metaphase II eggs. In contrast to the ability to undergo CG release, another important indicator of egg activation, the extent of initial sperm chromatin decondensation, was not affected (Ducibella and Buetow, 1994).

Because some stages of mouse and human fertilized pre-metaphase II oocytes undergo localized CG release in the immediate vicinity of the fertilizing spermatozoon, it appears that a 'primary' stimulus for exocytosis is activated in those cases and the oocyte cortex is competent to initiate the process of CG exocytosis. This localized stimulus is likely to be derived from a sperm receptor- or sperm factor-mediated onset of signalling of egg activation (reviewed by Whitaker and Swann, 1993), and possibly from a spermatozoon-mediated sensitization of Ca release (Swann, 1994). However, the spread of stimulation of exocytosis, resulting in global release, does not appear to take place. In sea urchins, CG release is initiated from the point of fertilization, spreads radially (Vacquier and Payne, 1973), and appears to follow the wave of elevated intracellular Ca. Because the Ca wave (reviewed in Nuccitelli, 1991; Miyazaki *et al.*, 1993) and CG release (Ducibella and Buetow, 1994) originate from the locus of fertilization, a wave of Ca-dependent CG exocytosis is also likely to take place in fertilized metaphase II mammalian eggs. Because the first Ca transient in fertilized metaphase I mouse oocytes is similar to that in metaphase II eggs (Mehlmann and Kline, 1994) and localized Ca release has not yet been observed in fertilized hamster oocytes (Fujiwara *et al.*, 1993), it is possible that localized CG exocytosis in metaphase I mouse oocytes is not due to localized Ca release.

Localized CG release can also occur in maturing oocytes in the absence of spermatozoa. During normal meiotic maturation, localized CG release occurs over the metaphase spindle in mouse (Ducibella *et al.*, 1990c; Okada *et al.*, 1993) and hamster oocytes (Okada *et al.*, 1986; Cherr *et al.*, 1988), but has not been detected in oocytes of the pig (Yoshida *et al.*, 1993) and cat (Byers *et al.*, 1992). Is the spindle-associated localized release in rodent oocytes due to a metaphase-associated local release of intracellular Ca?

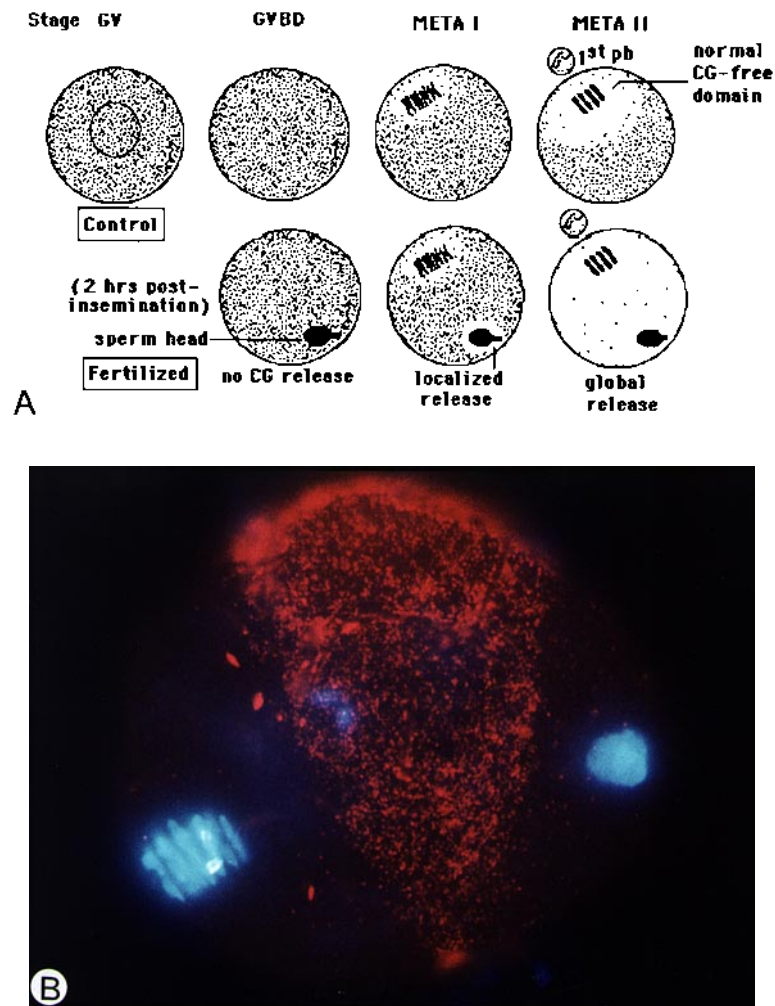

**Figure 2.** (A) The extent of cortical granule (CG) release as a function of oocyte meiotic stage in the mouse is shown. During normal meiotic maturation a CG-free domain appears over the metaphase chromosomes (Control). In oocytes fertilized at the indicated stages of maturation, there is a progression from no quantifiable net CG loss from the cortex at the germinal vesicle stage, to localized release at metaphase (meta) I, and finally to global release at meta II. GVBD = germinal vesicle breakdown; pb = polar body. (B) Fluorescence micrograph of localized CG release in a maturing mouse oocyte fertilized at meta I, as depicted in A (chromatin is blue, CG are red). Maternal chromosomes are shown on the left and decondensing sperm chromatin on the right, 2 h post-insemination of zona-free oocytes. Note that the CG have been lost over the sperm chromatin, whereas the remaining CG-occupied cortex is still densely populated. The area over the maternal chromosomes has the normal CG-free domain that develops between meta I and II in mouse and hamster eggs. Quantitative studies have demonstrated that neither the sperm- or maternal chromosome-associated CG-free domain can be accounted for by CG redistribution alone (Ducibella *et al.*, 1990c; Ducibella and Beutow, 1994). Multiple exposures were taken at different focal planes. CG staining was achieved with *Lens culinaris* agglutinin-avidin/Texas Red, and chromatin staining with Hoechst 33258/DAPI.

Meiotic maturation requires extracellular Ca, but elevated intracellular Ca was not observed during meiosis I in mouse oocytes (Tombes *et al.*, 1992). Perhaps, there are localized increases in protein kinase activity at the sites of fertilization and the metaphase I spindle that are responsible for localized CG release in some maturing oocytes. Further studies are needed to identify the regulatory and structural molecules involved in CG exocytosis in order to determine whether they are involved in localized CG release as well as normal fertilization-associated exocytosis. Thus, the basis for localized release may remain a mystery

until early events at the site of fertilization and maturation-associated changes in the ability to undergo global CG exocytosis are discovered.

### Cytoplasmic maturation and human IVF

With the increasing use of human and domestic animal ovulation induction, IVF, and other assisted reproductive technologies, the normal mechanisms that control egg maturation and timing of fertilization are being altered and manipulated externally. For example, in human IVF pro-

grammes ~40% of the egg masses collected contain pre-metaphase II-stage oocytes (Flood *et al.*, 1990; Hammitt *et al.*, 1993). Because of difficulties in staging oocytes within the dense cumulus mass, many clinical groups are likely to be inseminating some oocytes that have not reached metaphase II (Hammitt *et al.*, 1992). If cytoplasmic maturation is not completed before fertilization, egg activation by spermatozoa is not likely to occur normally. In normally maturing human oocytes, it is important to establish when activation competence develops and how long it is maintained. This information will dictate the temporal window in which fertilization (and hence, assisted reproductive procedures) should take place.

In human IVF, many immature oocytes are collected and, even after culture, polyspermy rates are significant (~10%; Hammitt *et al.*, 1993). One prediction from animal studies is that fertilized immature human oocytes will have a higher rate of zona penetration and/or polyspermy. Although polyspermy due to immaturity has been reported in human oocytes (Trounson *et al.*, 1982; Veeck, 1994), carefully controlled studies are not available and are made difficult by the problem of staging oocytes within their dense cumulus. Although meiotically incompetent or delayed GV-stage human oocytes do not become polyspermic, they appear to undergo higher sperm penetration of the zona consistent with their failure to undergo complete CG loss (Van Blerkolm *et al.*, 1994). Delayed fertilization in many mammals also can result in a higher incidence of polyspermy (Austin, 1974). The relative contributions of different causes of polyspermy or multiple sperm penetration of the zona in human IVF have not been rigorously established.

Because precise in-vitro maturation conditions are important (Eppig, 1991) and have not been optimized for human oocytes, a second prediction is that cytoplasmic maturation is likely to be compromised, resulting in decreased clinical success. For example, when mouse GV-stage oocytes underwent meiotic maturation in different culture media and then all were transferred to the same optimized medium for insemination and cleavage, the groups had significantly different percentages of blastocyst development (Van de Sandt *et al.*, 1990; Eppig, 1991). This study indicated the importance of maturation conditions on post-meiotic developmental events. In oocytes from small follicles, acceleration of maturation (*in vivo* via exogenous gonadotrophins or *in vitro* via removal from the follicle) followed by IVF results in a lower percentage of viable embryos compared to embryos from oocytes that developed *in vivo* (Eppig *et al.*, 1992, 1994). In addition, the latter studies demonstrated that accelerated development resulted in apparently normal nuclear (meiotic) maturation,

suggesting that normal cytoplasmic maturation had not taken place and is more sensitive to accelerated development. Because eggs from small antral follicles that are stimulated by high concentrations of exogenous gonadotrophins are also collected in human IVF, cytoplasmic maturation and later development may be compromised in some oocytes without necessarily preventing meiotic maturation, fertilization and even the formation of two pronuclei.

In-vitro maturation of human GV-stage oocytes to metaphase II followed by insemination has resulted in reduced fertilization rates and poor clinical success of those eggs that were fertilized (Flood *et al.*, 1990; Hammitt *et al.*, 1993). Possible causes include inadequate culture conditions, inherent oocyte quality and abnormal recruitment. Cytoplasmic immaturity could lead to a failure to develop the signalling pathway mechanisms, informational molecules or nutritional stores that may be required later for normal egg activation or preimplantation development. Just as maturational asynchrony between cumulus–coronal morphology and nuclear maturity of the egg has been observed in stimulated human cycles (Laufer *et al.*, 1984; Hammitt *et al.*, 1993), asynchrony also has been suggested between oocyte nuclear and cytoplasmic maturation, in which the latter appeared to be delayed (Sundstrom and Nilsson, 1988).

In animal IVF, culture conditions play an important role in optimizing fertilization rates by preventing zona hardening. In serum-free medium, the normal maturation-associated loss of CG in mouse oocytes results in ZP biochemical changes, i.e. the conversion of ZP2 to ZP2<sub>f</sub> (Ducibella *et al.*, 1990c), leading to a block in sperm penetration (Downs *et al.*, 1986; Choi *et al.*, 1987). Follicular fluid (DeFelici *et al.*, 1985; Kalab *et al.*, 1993), 5% serum (Downs *et al.*, 1986; Choi *et al.*, 1987) and fetuin, a specific protease inhibitor in serum (Schroeder *et al.*, 1990; Kalab *et al.*, 1991, 1993), but not albumin (Downs *et al.*, 1986; Ducibella *et al.*, 1990c) prevent these changes in the mouse ZP. In human eggs, protection from ZP hardening also is likely to be important in maturing oocytes (Ducibella *et al.*, 1990b) because (i) many oocytes are collected before they reach metaphase II, (ii) spontaneous CG loss has been observed in cultured human unfertilized eggs (Rousseau *et al.*, 1977; Tam *et al.*, 1990) and (iii) a biochemical change indicative of ZP hardening and CG loss occurs in some cultured human eggs that fail to fertilize in the absence of serum (Ducibella *et al.*, 1995). Studies are needed of the human ZP during meiotic maturation in the presence or absence of serum, follicular fluid and fetuin.

With regard to routine human IVF, these studies (i) suggest the importance of the stage of the oocyte in timing spermatozoon–egg interaction, (ii) emphasize the need to

devise additional methods for staging and tracking the eggs collected and (iii) support the development of improved methods for in-vitro culture and in-vivo follicular maturation that allow meiotically immature oocytes to complete not only nuclear (meiotic) maturation, but also cytoplasmic maturation with the prevention of ZP hardening. The process of optimizing oocyte quality would be greatly facilitated by biochemical markers of important maturational events, especially those involved later in fertilization or early development. One example is the identification of egg activation and CG exocytosis signalling step(s) that appear to develop between GV breakdown and metaphase II. Just as specific chromatin configurations allow us to track nuclear meiotic progress, a progression of appropriate cytoplasmic markers will provide sequential assessment of cytoplasmic development. These markers would be useful in experimental studies of media optimization for in-vitro maturation of GV-stage oocytes and evaluating new follicular maturation/ovulation induction protocols.

### Cytoplasmic response after ICSI

Cytoplasmic maturation is also likely to be important for success in intracytoplasmic sperm injection (ICSI). Although ICSI appears to bypass the initial gamete plasma membrane interactions, the egg cytoplasm still has to respond with a signal(s) to activate a programme for embryonic development and to transform the sperm chromatin into a male pronucleus. Normally, both egg activation (as mentioned previously) and sperm chromatin transformations (Usui and Yanagimachi, 1976; Zirkin *et al.*, 1989; Longo, 1990; Perreault, 1990) require metaphase II mammalian egg cytoplasm, whereas cytoplasm from earlier meiotic stages is not fully competent. Cytoplasmic maturation may be incomplete in ICSI eggs in which the sperm membrane has broken down, but egg activation and complete CG release did not occur (Sousa and Tesarik, 1994).

The process of egg activation in ICSI is of interest for several reasons: (i) ICSI is a new, clinical procedure to treat severe male infertility where routine IVF has failed (Palermo *et al.*, 1992; Van Steirteghem *et al.*, 1993a,b), (ii) the ICSI procedure appears to bypass important gamete plasma membrane interactions involved in egg activation in unassisted fertilization and (iii) new knowledge about the ICSI activation mechanism may be applied to improve fertilization and pregnancy rates (Edwards and Van Steirteghem, 1993). Although the precise mechanism of egg activation in ICSI has not been demonstrated, an increase in intracellular Ca is probably involved because (i) it has an obligatory role in normal mammalian fertilization (Kline and Kline, 1992a), (ii) Ca oscillations are observed in the

human egg after insemination (Taylor *et al.*, 1993), (iii) Ca increases are detected after ICSI (Tesarik *et al.*, 1994; Tesarik and Sousa, 1994) and (iv) eggs that have failed fertilization in ICSI have intact CG (Sousa and Tesarik, 1994), suggestive of a failure of appropriate Ca elevation.

Mammalian fertilization is quickly followed by a series of Ca oscillations. In hamsters, mice, and rabbits (Miyazaki *et al.*, 1993; Fissore and Robl, 1994; Mehlmann and Kline, 1994), following fertilization there is a major Ca transient immediately followed by several hours of regular, periodic transients every 5–10 min, whereas longer intervals have been observed in bovine eggs (Fissore *et al.*, 1992). The amplitude and/or frequency of the initial or first few transient(s) may determine the extent of CG exocytosis (Kline and Kline, 1992a). In the human, studies have been limited by the availability of mature eggs and the use of aged unfertilized eggs. Fertilized human eggs undergo Ca oscillations with a variable (10–35 min) frequency (Taylor *et al.*, 1993). Subzonal insemination (SUZI) of fresh or aged human eggs is followed by a major Ca transient and Ca oscillations (Tesarik and Sousa, 1994). Their frequency (3–15 min) and wave-like propagation from a locus in the egg cortex are similar to those of fertilized animal eggs, and their amplitude decreases with time over 1–3 h.

In contrast, a study of human ICSI reported two widely separate Ca 'episodes'. Human eggs subjected to ICSI are characterized by three phases during the response (Tesarik *et al.*, 1994): an initial Ca increase lasting 2–3 min due to the influx of extracellular Ca associated with injection, followed by a 4–12 h period without detectable responses, and finally, 30–60 min of Ca oscillations with frequencies of between 1 and 5 min. Oscillations are initiated near the cortex, but thereafter their source becomes less focused with time. The initial Ca transient is not due to the interaction of the spermatozoon with the egg cytoplasm because it is detected when either the injection solution without spermatozoa or even a pipette without a lumen (in medium with 1–2 mM extracellular Ca) is used (Tesarik *et al.*, 1994). In this study, this first transient appears to be initiated by exogenous Ca, while the participation of CICR [Ca(exogenous) – induced Ca(endogenous) release] from internal stores has not been rigorously investigated. The injection of 1.8 mM Ca into unfertilized rabbit eggs results in a single Ca transient about one-half the amplitude of that observed upon fertilization (Fissore and Robl, 1994), although the volume of fluid injected in human ICSI may be larger, introducing more Ca. The injection of Ca alone into unfertilized eggs does not cause Ca oscillations typical of those in normal fertilization in animal eggs (Igusa and Miyazaki, 1983; Fissore and Robl, 1994; Kline and Kline, 1994) or those in human ICSI after the long delay (Tesarik



*et al.*, 1994). In any case, little is known about any early effects of this first large Ca transient on the human egg's endogenous Ca and signalling machinery after ICSI. It is entirely possible that this initial Ca elevation is sufficient for egg CG exocytosis, but not for subsequent events like second polar body and pronuclear formation, which are not observed (Tesarik *et al.*, 1994).

The basis for this unusual Ca response in human ICSI may reside in the mechanism controlling intracellular cytosolic egg Ca concentrations and in the question of whether sperm factors are involved in egg activation. The long lag period in which Ca stays low after the initial brief Ca rise is surprising, unless the egg is still 'waiting' for a sperm factor or Ca oscillations have been suppressed temporarily. It is tempting to invoke the former, in which the sperm membranes must break down for a sperm factor(s) to enter the egg cytoplasm. Support for such factors in human ICSI comes from the activity of sperm cytosolic fractions (Dozortsev *et al.*, 1995) and the observation that oscillations fail to appear in sham-injected eggs without spermatozoa in which only the initial Ca increase occurs (Tesarik *et al.*, 1994). By analogy with fertilization events, Ca oscillations should appear shortly after (probably within minutes) the entry of the proposed sperm factor into the egg cytoplasm. The timing of sperm factor release should be indicated by sperm head plasma membrane breakdown. An electron microscopic study in the mouse demonstrates that both the sperm plasma membrane and nuclear envelopes have broken down within 1 h of ICSI (Kimura and Yanagimachi, 1995). Yet, in the human, Ca oscillations do not begin until 4–12 h after ICSI. Interpretation of these data await the identification, after ICSI, of the timing of sperm plasma membrane breakdown in the human egg and of Ca oscillations in the mouse egg. In addition, the identity of the putative sperm factor(s) remains to be established. If a sperm factor participates in egg activation during ICSI (which may or may not be the same sperm factor proposed to be involved in normal fertilization), time may be required to build a sufficient local concentration for activation or to diffuse to the appropriate target, e.g. the cortical ER.

Alternatively, the lag period before Ca oscillations in ICSI may be due to a temporary desensitization of the Ca release mechanism. However, several mechanisms involved in the desensitization of Ca stores do not readily explain the lag period, because the lag is so much longer in duration than that between oscillations after fertilization. The short fertilization-associated interval between normal oscillations is likely to be due to refilling and resensitizing cytoplasmic Ca stores. Refilling involves an ER Ca pump (Kline and Kline, 1992b) with an IP<sub>4</sub>-mediated Ca supply (Shirakawa and Miyazaki, 1995); whereas resensitizing is likely to require lowering cytosolic Ca and increasing cis-

ternal ER Ca, both of which are known to sensitize the IP<sub>3</sub> receptor (Marshall and Taylor, 1993; Missiaen *et al.*, 1994; for eggs, see Parys *et al.*, 1992). In order to determine if ICSI has an effect on the sensitivity of Ca stores to undergo release, it would be informative to know if Ca oscillations can be induced shortly after ICSI during the observed lag period. IP<sub>3</sub> injection or refertilization (e.g. SUZI) at various times after ICSI could be used to determine if there are changes in sensitivity to Ca release during the lag period. Although prolonged high cytosolic Ca from the ICSI procedure could inhibit the IP<sub>3</sub> receptor, this is unlikely to explain the long lag because injected cytosolic Ca appears to be rapidly sequestered or pumped out of the cell—Ca concentrations quickly return to baseline in Ca injection studies.

Although one could simplistically interpret ICSI as Ca activation after bypassing spermatozoon–egg membrane interaction, there remain many unanswered questions. Is there any developmental disadvantage to the significant temporal separation of the exogenously induced initial Ca rise (with an expected episode of CG release) and later Ca oscillations? Besides CG release, what events are triggered by the initial, exogenous Ca transient in both the absence and presence of an injected spermatozoon? What initiates the Ca oscillations in ICSI? What is occurring during the Ca lag phase? Do the amplitude and frequency of the Ca oscillations regulate early developmental events, as proposed for mouse and bovine egg activation (Vitullo and Ozil, 1992; Collas *et al.*, 1993), and have these parameters been optimized for clinical success in human ICSI? Does the injection solution play a role in egg activation and, if so, have the solutes been optimized? Why do some eggs that promote sperm plasma membrane breakdown fail to undergo CG release and egg activation (Sousa and Tesarik, 1994)? It has been proposed that some cases of failed egg activation or aberrant early development may be due to abnormal Ca release after fertilization (Homa *et al.*, 1993).

### **A developmental temporal window for normal egg CG release and activation**

The acquisition of competence to undergo normal CG exocytosis and the development of the block(s) to polyspermy are likely to represent a larger, more important and clinically relevant process: development of the ability to undergo normal fertilization and activation of development. Both CG release and other zygotic activation events depend on the release of intracellular Ca, which is regulated by second messengers interacting with cytoplasmic Ca stores. An emerging body of evidence is growing that during the final phase of meiotic maturation, close to the time of ovulation or oocyte retrieval in the case of human

IVF, the oocyte's Ca release mechanism becomes fully competent. Temporal studies on the development of the ability to undergo activation are consistent with the idea that Ca-dependent effectors involved in CG release and cell cycle resumption become functional or change localization during egg maturation and after ovulation. For example, compared to newly formed metaphase II mouse eggs, those several hours after ovulation have a higher percentage or faster rate of pronuclear development after fertilization or artificial activation (Fraser, 1979; Kubiak, 1989) and, within 5–10 h of ovulation, mouse oocytes become increasingly sensitive to Ca injection (Fulton and Whittingham, 1978) and spontaneous activation (Whittingham and Siracusa, 1978). After 10–20 h of ovulation, mammalian egg ageing (Austin, 1974) ensues, including changes in the egg cortex, cortical granules and ability to undergo CG release (reviewed in Ducibella, 1991).

Thus, the mammalian egg cortex and activation machinery appear to be continually changing after meiotic maturation resumes and there is likely to be a temporal window in which normal eggs have the highest likelihood of undergoing a normal cortical reaction and activation of development. This window may entail a shorter time than previously appreciated and is particularly relevant to animal and human IVF in which oocytes and eggs may undergo either unusually rapid recruitment and maturation or prolonged arrest in metaphase II in culture or even intrafollicularly. Although the high percentage of combined fertilization failure and early embryo loss in both ICSI and routine IVF probably has multiple causes, a major causal player is likely to be the cytoplasm, in addition to nuclear and maternal contributions. Characterization of not only the cytoplasmic activation pathways involved in CG exocytosis and cell cycle resumption in mature eggs, but also changes in the activation molecules and machinery during and after oocyte maturation (*in vivo* and *in vitro*) will provide new scientific information with potentially important clinical benefit.

## Acknowledgements

The author thanks Drs Richard Schultz, Raphael Fissore, Douglas Kline and John Eppig for reading the manuscript and for their thoughtful suggestions.

## References

- Austin, C.R. (1974) Fertilization. In Lash, J. and Whittaker, J.R. (eds), *Concepts of Development*. Sinauer Associates, Stanford, CT, pp. 48–75.
- Ayabe, T., Kopf, G.S. and Schultz, R.M. (1995) Regulation of mouse egg activation: presence of ryanodine receptors and effects of microinjected ryanodine and cyclic ADP ribose on unispermated and inseminated eggs. *Development*, **121**, 2233–2244.
- Baker, P.F. and Whitaker, M.J. (1979) Trifluoperazine inhibits exocytosis in sea-urchin eggs. *J. Physiol. (Lond.)*, **298**, 55.
- Beatty, R.A. (1978) The origin of human triploidy: an integration of qualitative and quantitative evidence. *Ann. Hum. Genet.*, **41**, 299–314.
- Bement, W.M. (1992) Signal transduction by calcium and protein kinase C during egg activation. *J. Exp. Zool.*, **263**, 382–397.
- Bement, W.M. and Capco, D.G. (1989) Activators of protein kinase C trigger cortical granule exocytosis, cortical contraction, and cleavage furrow formation in *Xenopus laevis* oocytes and eggs. *J. Cell Biol.*, **108**, 855–892.
- Bement, W.M. and Capco, D.G. (1990) Protein kinase C acts downstream of calcium at entry into the first mitotic interphase of *Xenopus laevis*. *Cell Regulation*, **1**, 315–326.
- Berridge, M.J. (1993) Inositol trisphosphate and calcium signalling. *Nature*, **361**, 315–325.
- Bleil, J.D. (1991) Sperm receptors of mammalian eggs. In Wassarman, P.M. (ed.), *Elements of Mammalian Fertilization*, Vol. 1. CRC Press, Boca Raton, FL, pp. 133–152.
- Boue, J., Boue, A. and Lazar, P. (1975) The epidemiology of human spontaneous abortions with chromosomal anomalies. In Blandau, R.J. (ed.), *Ageing Gametes: Their Biology and Pathology*. Karger, New York, pp. 330–348.
- Burgoyne, R.D. and Morgan, A. (1993) Regulated exocytosis. *J. Biochem.*, **293**, 305–316.
- Byers, A.P., Barone, M.A., Donoghue, A.M. and Wildt, D.E. (1992) Mature domestic cat oocyte does not express a cortical granule-free domain. *Biol. Reprod.*, **47**, 709–715.
- Campanella, C., Andreuccetti, P., Taddei, C. and Talevi, R. (1984) The modifications of cortical endoplasmic reticulum during the *in vitro* maturation of *Xenopus laevis* oocytes and its involvement in cortical granule exocytosis. *J. Exp. Zool.*, **229**, 283–293.
- Charbonneau, M. and Grey, R.D. (1984) The onset of activation responsiveness during maturation coincides with the formation of the cortical endoplasmic reticulum in oocytes of *Xenopus laevis*. *Dev. Biol.*, **102**, 90–97.
- Cheek, T.R. (1989) Spatial aspects of calcium signalling. *J. Cell Sci.*, **93**, 211–216.
- Cherr, G.N. and Ducibella, T. (1990) Activation of the mammalian egg: cortical granule distribution, exocytosis, and the block to polyspermy. In Bavister, B.D., Cummins, J. and Roldan, E.R.S. (eds.), *Fertilization in Mammals*. Sero Symposia USA, Norwell, MA, pp. 309–330.
- Cherr, G.N., Drobnis, E.A. and Katz, D.F. (1988) Localization of cortical granule constituents before and after exocytosis in hamster egg. *J. Exp. Zool.*, **246**, 81–93.
- Chiba, K., Kado, R.T. and Jaffe, L.A. (1990) Development of calcium release mechanisms during starfish oocyte maturation. *Dev. Biol.*, **140**, 300–306.
- Choi, T.S., Mori, M., Kohmoto, K. and Shoda, Y. (1987) Beneficial effect of serum on the fertilizability of mouse oocytes matured *in vitro*. *J. Reprod. Fertil.*, **79**, 565–568.
- Ciapa, B. and Whitaker, M. (1986) Two phases of inositol polyphosphate and diacylglycerol production at fertilization. *FEBS Lett.*, **195**, 347–351.
- Ciapa, B., Borg, B. and Whitaker, M. (1992) Phosphoinositide metabolism during the fertilization wave in sea urchin eggs. *Development*, **115**, 187–195.
- Clapham, D.E. (1995) Calcium signaling. *Cell*, **80**, 259–268.
- Collas, P., Fissore, R., Robl, J.M., Sullivan, E.J. and Barnes, F.L. (1993) Electrically induced calcium elevation, activation and parthenogenetic development of bovine oocytes. *Mol. Reprod. Dev.*, **34**, 212–223.
- Colonna, R., Tatone, C., Malgaroli, A., Eusebi, F. and Mangia, F. (1989) Effects of protein kinase C stimulation and free Ca<sup>2+</sup> rise in mammalian egg activation. *Gamete Res.*, **24**, 1171–1183.
- Cran, D.G. and Cheng, W.T.K. (1985) Changes in cortical granules during porcine oocyte maturation. *Gamete Res.*, **11**, 311–319.
- Cran, D.G. and Esper, C.R. (1990) Cortical granules and the cortical reaction in mammals. *J. Reprod. Fertil. (Suppl.)*, **42**, 177–188.
- Cran, D.G., Moor, R.M. and Irvine, R.F. (1988) Initiation of the cortical reaction in hamster and sheep oocytes in response to inositol trisphosphate. *J. Cell Sci.*, **91**, 139–144.

- Dale, B., DeFelice, L.J. and Ehrenstein, G. (1985) Injection of a soluble sperm extract into sea urchin eggs triggers the cortical reaction. *Experientia*, **41**, 1068–1070.
- DeFelici, M., Salustri, A. and Siracusa, G. (1985) "Spontaneous" hardening of the zona pellucida of mouse oocytes during in vitro culture. II. The effect of follicular fluid and glycosaminoglycans. *Gamete Res.*, **12**, 227–235.
- Downs, S.M., Schroeder, A.C. and Eppig, J.J. (1986) Serum maintains the fertilizability of mouse oocytes matured in vitro by preventing hardening of the zona pellucida. *Gamete Res.*, **15**, 115–122.
- Dozortsev, D., Rybouchkin, A., De Sutter, P., Qian, C. and Dhont, M. (1995) Human oocyte activation following intracytoplasmic injection: the role of the sperm cell. *Hum. Reprod.*, **10**, 403–407.
- Ducibella, T. (1991) Mammalian egg cortical granules and the cortical reaction. In Wasserman, P.M. (ed.), *Elements of Mammalian Fertilization*. CRC Press, Boca Raton, FL, pp. 205–230.
- Ducibella, T. and Buetow, J. (1994) Competence to undergo normal, fertilization-induced cortical activation develops after metaphase I of meiosis in mouse oocytes. *Dev. Biol.*, **165**, 95–104.
- Ducibella, T., Anderson, E., Albertini, D.F., Aalberg, J. and Rangarajan, S. (1988a) Quantitative studies of changes in cortical granule number and distribution in the mouse oocyte during meiotic maturation. *Dev. Biol.*, **130**, 184–197.
- Ducibella, T., Rangarajan, S. and Anderson, E. (1988b) The development of mouse oocyte cortical reaction competence is accompanied by major changes in cortical vesicles and not cortical granule depth. *Dev. Biol.*, **130**, 789–792.
- Ducibella, T., Duffy, P., Reindollar, R. and Su, B. (1990a) Changes in the distribution of mouse oocyte cortical granules and ability to undergo the cortical reaction during gonadotropin-stimulated meiotic maturation and aging in vivo. *Biol. Reprod.*, **43**, 870–876.
- Ducibella, T., Kopf, G.S. and Schultz, R.M. (1990b) Use of serum and timing of insemination for in vitro fertilization. *J. In Vitro Fertil. Embryo Transfer*, **7**, 121–123.
- Ducibella, T., Kurasawa, S., Rangarajan, S., Kopf, G.S. and Schultz, R.M. (1990c) Precocious loss of cortical granules during mouse oocyte meiotic maturation and correlation with egg-induced modification of the zona pellucida. *Dev. Biol.*, **137**, 46–55.
- Ducibella, T., Kurasawa, S., Duffy, P., Kopf, G.S. and Schultz, R.M. (1993) Regulation of the polyspermy block in the mouse egg: maturation-dependent differences in cortical granule exocytosis and zona pellucida modifications induced by inositol 1,4,5-trisphosphate and protein kinase C activators. *Biol. Reprod.*, **48**, 1251–1257.
- Ducibella, T., Dubey, A., Gross, V.S., Emmi, A., et al. (1995) A zona biochemical change and spontaneous cortical granule loss in eggs that fail to fertilize in IVF. *Fertil. Steril.*, **64**, 1154–1161.
- Dunbar, B.S., Prasad, S.V. and Timmons, T.M. (1991) Comparative structure and function of mammalian zonae pellucidae. In Dunbar, B.S. and O'Rand, M.G. (eds), *A Comparative Overview of Mammalian Fertilization*. Plenum Press, New York, pp. 97–135.
- Edwards, R.G. and Van Steirteghem, A.C. (1993) Intracytoplasmic sperm injections (ICSI) and human fertilization: does calcium hold the key to success? *Hum. Reprod.*, **8**, 988–989.
- Elinson, R.P. (1986) Fertilization in amphibians: the ancestry of the block to polyspermy. *Int. Rev. Cytol.*, **101**, 59–93.
- Endo, Y., Schultz, R.M. and Kopf, G.S. (1987a) Effects of phorbol esters and a diacylglycerol on mouse eggs: inhibition of fertilization and modification of the zona pellucida. *Dev. Biol.*, **119**, 99–209.
- Endo, Y., Mattei, P., Kopf, G.S. and Schultz, R.M. (1987b) Effects of phorbol ester on mouse eggs: dissociation of sperm receptor activity from acrosome reaction-inducing activity of the mouse zona pellucida protein ZP3. *Dev. Biol.*, **123**, 574–577.
- Eppig, J.J. (1991) Mammalian oocyte development in vivo and in vitro. In Wasserman, P. (ed.), *Elements of Mammalian Fertilization*. CRC Press, Boca Raton, Florida.
- Eppig, J.J., Schroeder, A.C. and O'Brien, M.J. (1992) Developmental capacity of mouse oocytes matured in vitro: effects of gonadotrophic stimulation, follicular origin and oocyte size. *J. Reprod. Fertil.*, **95**, 119–127.
- Eppig, J.J., Schultz, R.M., O'Brien, M. and Chesnel, F. (1994) Relationship between the developmental programs controlling nuclear and cytoplasmic maturation of mouse oocytes. *Dev. Biol.*, **164**, 1–9.
- Fissore, R.A. and Robl, J.M. (1994) Mechanism of calcium oscillations in fertilized rabbit eggs. *Dev. Biol.*, **166**, 634–642.
- Fissore, R.A., Dobrinsky, J.R., Balise, J.J., DUBY, R.T. and Robl, J. (1992) Patterns of intracellular Ca<sup>2+</sup> concentrations in fertilized bovine eggs. *Biol. Reprod.*, **47**, 960–969.
- Flood, J.T., Iritani, A., Chillik, C.F., Hodgen, G.D. and van Uem, J.F. (1990) Ooplasmic transfusion: prophase germinal vesicle oocytes made developmentally competent by microinjection of metaphase II egg cytoplasm. *Fertil. Steril.*, **53**, 1049–1054.
- Fraser, L.R. (1979) Rate of fertilization in vitro and subsequent nuclear development as a function of the postovulatory age of the mouse egg. *J. Reprod. Fertil.*, **55**, 153–160.
- Fujiwara, T., Nakada, K., Shirakawa, H. and Miyazaki, S. (1993) Development of inositol trisphosphate-induced calcium release mechanism during maturation of hamster oocytes. *Dev. Biol.*, **156**, 69–79.
- Fulton, B. and Whittingham, D. (1978) Activation of mammalian oocytes by intracellular injection of calcium. *Nature*, **273**, 149–151.
- Furuichi, T., Yoshikawa, S., Miyawaki, A., Wada, K., Maeda, N. and Mikoshiba, K. (1989) Primary structure and functional expression of the inositol 1,4,5-trisphosphate-binding protein P<sub>400</sub>. *Nature*, **342**, 32–38.
- Gallicano, G.I., Schwarz, S.M., McGaughey, R.W. and Capco, D.G. (1993) Protein kinase C, a pivotal regulator of hamster egg activation, functions after elevation of intracellular free calcium. *Dev. Biol.*, **156**, 94–106.
- Gallicano, G.I., McGaughey, R.W. and Capco, D.G. (1995) Protein kinase M, the cytosolic counterpart of protein kinase C, remodels the internal cytoskeleton of the mammalian egg during activation. *Dev. Biol.*, **167**, 482–501.
- Golbus, M.S. (1981) Chromosome aberrations and mammalian reproduction. In Mastroianni, L. and Biggers, J.D. (eds), *Fertilization and Embryonic Development In Vitro*. Plenum, New York.
- Gulyas, B.J. and Schmel, E.D. (1980) Ovoperoxidase activity in ionophore treated mouse eggs I. Electron microscopic localization. *Gamete Res.*, **3**, 267–278.
- Gwatkin, R.B.L., Williams, D.T., Hartmann, J.F. and Kniazuk, M. (1973) The zona reaction of hamster and mouse eggs: production in vitro by a trypsin-like protease from cortical granules. *J. Reprod. Fertil.*, **32**, 259–265.
- Hammit, D.G., Syrop, C.H., Van Voorhis, B.J., Walker, D.L., Miller, T.M., et al. (1992) Prediction of nuclear maturity from cumulus–coronal morphology: influence of embryologist experience. *J. Assist. Reprod. Genet.*, **9**, 439–448.
- Hammit, D.G., Syrop, C.H., Van Voorhis, B.J., Walker, D.L., Miller, T.M. and Barud, K.M. (1993) Maturational asynchrony between oocyte cumulus–coronal morphology and nuclear maturity in gonadotropin-releasing hormone agonist stimulations. *Fertil. Steril.*, **59**, 375–381.
- Han, J.K. and Nuccitelli, R.L. (1990) Inositol 1,4,5-trisphosphate-induced calcium release in the organelle layers of the stratified, intact egg of *Xenopus laevis*. *J. Cell Biol.*, **110**, 1103–1110.
- Henson, J.H., Begg, D.A., Beaulieu, S.M., Fishkind, D.J., Bonder, E.M., et al. (1989) A calsequestrin-like protein in the endoplasmic reticulum of the sea urchin: localization and dynamics in the egg and first cell cycle embryo. *J. Cell Biol.*, **109**, 149–161.
- Henson, J.H., Beaulieu, S.M., Kammer, B. and Begg, D. (1990) Differentiation of a calsequestrin containing endoplasmic reticulum during sea urchin oogenesis. *Dev. Biol.*, **142**, 255–269.
- Homa, S.T., Carroll, J. and Swann, K. (1993) The role of calcium in mammalian oocyte maturation and egg activation. *Hum. Reprod.*, **8**, 1274–1281.
- Hoodbhoy, T. and Talbot, P. (1994) Mammalian cortical granules: contents, fate, and function. *Mol. Reprod. Dev.*, **39**, 439–448.
- Hunter, R.H.R., Cook, B. and Baker, T.G. (1976) Dissociation of response to injected gonadotropin between the Graafian follicle and oocyte in pigs. *Nature*, **260**, 156–157.

- Igusa, Y. and Miyazaki, S.-I. (1983) Effects of altered extracellular and intracellular calcium concentration on hyperpolarizing responses of the hamster egg. *J. Physiol. (Lond.)*, **340**, 611–632.
- Jacobs, P.A., Angell, R.R., Buchanan, I.M., Hassold, T.J., Matsuyama, A.M. and Manuel. (1978) The origin of human triploids. *Ann. Hum. Genet.*, **42**, 49–57.
- Jaffe, L.F. (1985) The role of calcium explosions, waves, and pulses in activating eggs. In Metz, C.B. and Monroy, A., (eds), *Biology of Fertilization*. Academic Press, New York, pp. 127–165.
- Jaffe, L.A. and Gould, M. (1985) Polyspermy-preventing mechanisms. In Metz, C.B. and Monroy, A., (eds), *Biology of Fertilization*, vol. 3. Academic Press, New York, pp. 223–250.
- Jaffe, L.A. and Terasaki, M. (1994) Structural changes in the endoplasmic reticulum of starfish oocytes during meiotic maturation and fertilization. *Dev. Biol.*, **164**, 579–587.
- Janmey, P.A. and Stossel, T.P. (1987) Modulation of gelsolin function by phosphatidylinositol 4,5-bisphosphate. *Nature*, **325**, 362–364.
- Kalab, P., Kopf, G.S. and Schultz, R. M. (1991) Modifications of the mouse zona pellucida during oocyte maturation and egg activation: effects of newborn calf serum and fetuin. *Biol. Reprod.*, **45**, 783–787.
- Kalab, P., Schultz, R.M. and Kopf, G.S. (1993) Modifications of the mouse zona pellucida during oocyte maturation: inhibitory effects of follicular fluid, fetuin, and alpha2HS-glycoprotein. *Biol. Reprod.*, **49**, 561–567.
- Kimura, Y. and Yanagimachi, R. (1995) Intracytoplasmic sperm injection in the mouse. *Biol. Reprod.*, **52**, 709–720.
- Kline, D. and Kline, J.T. (1992a) Repetitive calcium transients and the role of calcium in exocytosis and cell cycle activation in the mouse egg. *Dev. Biol.*, **149**, 80–89.
- Kline, D. and Kline, J.T. (1992b) Thapsigargin activates a calcium influx pathway in the unfertilized mouse egg and suppresses repetitive calcium transients in the fertilized egg. *J. Biol. Chem.*, **267**, 17624–17630.
- Kline, J.T. and Kline, D. (1994) Regulation of intracellular calcium in the mouse egg: evidence for inositoltriphosphate-induced calcium release, but not calcium-induced calcium release. *Biol. Reprod.*, **50**, 193–203.
- Kline, D. and Stewart-Savage, J. (1994) The timing of cortical granule fusion, content dispersal, and endocytosis during fertilization of the hamster egg: an electrophysiological and histochemical study. *Dev. Biol.*, **162**, 277–287.
- Kline, D., Simoncini, L., Mandel, G., Maue, R.A., Kado, R.T. and Jaffe, L.A. (1988) Fertilization events induced by neurotransmitters after injection of mRNA in *Xenopus* eggs. *Science*, **241**, 464–467.
- Kola, I. and Trounson, A. (1989) Dispermic human fertilization: violation of expected cell behavior. In Schatten, H. and Schatten, G. (eds), *The Cell Biology of Fertilization*. Academic Press, New York, pp. 277–293.
- Kubiak, J. (1989) Mouse oocytes gradually develop the capacity for activation during the metaphase II arrest. *Dev. Biol.*, **136**, 537–545.
- Kume, S., Muto, A., Aruga, J., Nakagawa, T., Michikawa, T., et al. (1993) The *Xenopus* IP3 receptor: structure, function, and localization in oocytes and eggs. *Cell*, **73**, 555–570.
- Kurasawa, S., Schultz, R.M. and Kopf, G.S. (1989) Egg-induced modifications of the zona pellucida of mouse eggs: effects of microinjected inositol 1,4,5-trisphosphate. *Dev. Biol.*, **133**, 295–304.
- Larabell, C. and Nuccitelli, R. (1992) Inositol lipid hydrolysis contributes to the Ca<sup>2+</sup> wave in the activating egg of *Xenopus laevis*. *Dev. Biol.*, **153**, 347–355.
- Laufer, N., Tarlatzis, B.C., DeCherney, A.H., Master, J.T., Haseltine, F.P., et al. (1984) Asynchrony between human cumulus–corona cell complex and oocyte maturation after human menopausal gonadotropin treatment for in vitro fertilization. *Fertil. Steril.*, **42**, 366–372.
- Lee, S.H., Ahuja, K.K., Gilbert, D.J. and Whittingham, D.G. (1988) The appearance of glycoconjugates associated with cortical granule release during mouse fertilization. *Development*, **102**, 595–604.
- Liang, L.-F. and Dean, J. (1993) Oocyte development: molecular biology of the zona pellucida. *Vitamins Horm.*, **47**, 115–159.
- Longo, F.J. (1978) Insemination of immature sea urchin (*Arbacia punctulata*) eggs. *Dev. Biol.*, **62**, 271–291.
- Longo, F.J. (1990) Dynamics of sperm nuclear transformations. In Bavister, B.D., Cummins, J. and Roldan, E.R.S. (eds), *Fertilization in Mammals*. Serono Symposia USA, Norwell, MA, pp. 297–330.
- Longo, F.J. and Chen, D.Y. (1985) Development of cortical polarity in mouse eggs: Involvement of the meiotic apparatus. *Dev. Biol.*, **107**, 382–394.
- Luttmer, S. and Longo, F.J. (1985) Ultrastructural and morphometric observations of cortical endoplasmic reticulum in *Arbacia*, *Spisula*, and mouse eggs. *Dev. Growth Differentiation*, **27**, 349–359.
- Maeda, N., Niinobe, M. and Mikoshiba, K. (1990) A cerebellar Purkinje cell marker P<sub>400</sub> protein is an inositol 1,4,5-trisphosphate (InsP<sub>3</sub>) receptor protein. Purification and characterization of InsP<sub>3</sub> receptor complex. *EMBO J.*, **9**, 61–67.
- Marshall, I.C.B. and Taylor, C.W. (1993) Regulation of inositol 1,4,5-trisphosphate receptors. *J. Exp. Biol.*, **184**, 161–182.
- Mate, K.E., Giles, I. and Rodger, J.C. (1992) Evidence that cortical granule formation is a preovulatory event in marsupials. *J. Reprod. Fertil.*, **95**, 719–728.
- McPherson, S.M., McPherson, P.S., Mathews, K., Campbell, K.P. and Longo, F.J. (1992) Cortical localization of calcium release channel in sea urchin eggs. *J. Cell Biol.*, **116**, 1111–1121.
- Mehlmann, L.M. and Kline, D. (1994) Regulation of intracellular calcium in the mouse egg: calcium release in response to sperm or inositol trisphosphate is enhanced after meiotic maturation. *Biol. Reprod.*, **51**, 1088–1098.
- Mehlmann, L.M., Terasaki, M., Jaffe, L. and Kline, D. (1995) Reorganization of the endoplasmic reticulum during meiotic maturation of the mouse oocyte. *Dev. Biol.*, in press.
- Miller, D.J., Gong, X., Decker, G. and Shur, B.D. (1993) Egg cortical granule N-acetylglucosaminidase is required for the mouse zona block to polyspermy. *J. Cell Biol.*, **123**, 1431–1440.
- Missiaen, L., De Smedt, H., Parys, J.B. and Casteels (1994) Co-activation of inositol trisphosphate-induced Ca<sup>2+</sup> release by cytosolic Ca<sup>2+</sup> is loading-dependent. *J. Biol. Chem.*, **269**, 7238–7242.
- Miyazaki, S. (1995) Inositol trisphosphate receptor mediated spatiotemporal calcium signalling. *Curr. Opin. Cell Biol.*, **7**, 190–196.
- Miyazaki, S., Katayama, Y. and Swann, K. (1990) Synergistic activation by serotonin and GTP analogue and inhibition by phorbol ester of cyclic Ca<sup>2+</sup> rises in hamster eggs. *J. Physiol.*, **426**, 209–227.
- Miyazaki, S., Yuzaki, M., Nakada, K., Shirakawa, H., Nakanishi, S., et al. (1992) Block of Ca<sup>2+</sup> wave and Ca<sup>2+</sup> oscillation by antibody to the inositol 1,4,5-trisphosphate receptor in fertilized hamster eggs. *Science*, **257**, 251–255.
- Miyazaki, S., Shirakawa, H., Nakada, K. and Honda, Y. (1993) Essential role of the inositol 1,4,5-trisphosphate receptor/Ca<sup>2+</sup> release channel in Ca<sup>2+</sup> waves and Ca<sup>2+</sup> oscillations at fertilization of mammalian eggs. *Dev. Biol.*, **158**, 62–78.
- Moller, C.C. and Wassarman, P.M. (1989) Characterization of a proteinase that cleaves zona pellucida glycoprotein ZP2 following activation of mouse eggs. *Dev. Biol.*, **132**, 103–112.
- Moore, G.D., Kopf, G.S. and Schultz, R.M. (1993) Complete mouse egg activation in the absence of sperm by stimulation of an exogenous G protein-coupled receptor. *Dev. Biol.*, **159**, 669–678.
- Moos, J., Faundes, D., Kopf, G.S. and Schultz, R.M. (1995) Composition of the human zona pellucida and modifications following fertilization. *Mol. Hum. Reprod.*, **1**, see *Hum. Reprod.*, **10**, 2467–2471.
- Nuccitelli, R. (1991) How do sperm activate eggs? *Curr. Top. Dev. Biol.*, **25**, 1–16.
- Nuccitelli, R., Ferguson, J. and Han, J.K. (1989) The role of the phosphatidylinositol cycle in the activation of the frog egg. In Nuccitelli, R., Cherr, G.N. and Clark, W.H. (eds), *Mechanisms of Egg Activation*. Plenum, New York, pp. 215–230.
- Okada, A., Yanagimachi, R. and Yanagimachi, H. (1986) Development of cortical granule-free area of cortex and the perivitelline space in the hamster oocyte during maturation and following ovulation. *J. Submicrosc. Cytol.*, **18**, 233–247.
- Okada, A., Inomata, K. and Nagae, T. (1993) Spontaneous cortical granule release and alteration of zona pellucida properties during and after meiotic maturation of mouse oocytes. *Anat. Rec.*, **237**, 518–526.



- Palermo, G., Joris, H., Devroey, P. and Van Steirteghem, A.C. (1992) Pregnancies after intracytoplasmic injection of a single spermatozoon into an oocyte. *Lancet*, **340**, 17–18.
- Parys, J.B., Sernett, S.W., DeLisle, S., Snyder, P.M., Welsh, M.J. and Campbell, K.P. (1992) Isolation, characterization, and localization of the inositol 1,4,5-trisphosphate receptor protein in *Xenopus laevis* oocytes. *J. Biol. Chem.*, **267**, 18776–18782.
- Parys, J.B., McPherson, S.M., Mathews, L., Campbell, K.P. and Longo, F.J. (1994) Presence of inositol 1,4,5-trisphosphate receptor, calreticulin, and calsequestrin in eggs of sea urchins and *Xenopus laevis*. *Dev. Biol.*, **161**, 466–476.
- Perreault, S.D. (1990) Regulation of sperm nuclear reactivation during fertilization. In Bavister, B.D., Cummins, J. and Roldan, E.R.S. (eds), *Fertilization in Mammals*. Sero Symposium USA, Norwell, MA, pp. 285–296.
- Pierce, K.E., Siebert, M.C., Kopf, G.S., Schultz, R.M. and Calarco, P.G. (1990) Characterization and localization of a mouse egg cortical granule antigen prior to and following fertilization or egg activation. *Dev. Biol.*, **141**, 381–392.
- Pierce, K.E., Grunvald, E.L., Schultz, R.M. and Kopf, G.S. (1992) Temporal pattern of synthesis of the mouse cortical granule protein, p75, during oocyte growth and maturation. *Dev. Biol.*, **152**, 145–151.
- Rousseau, P., Meda, P., Lecart, C., Haumont, S. and Ferin, J. (1977) Cortical granule release in human follicular oocytes. *Biol. Reprod.*, **16**, 104–111.
- Sathananthan, A.H. and Trounson, A.O. (1982) Ultrastructural observations on cortical granules in human follicular oocytes cultured in vitro. *Gamete Res.*, **5**, 191–198.
- Schroeder, A.C., Shultz, R., Kopf, G., Taylor, F., Becker, R. and Eppig, J. (1990) Fetuin inhibits zona pellucida hardening and conversion of ZP2 to ZP2f during spontaneous mouse oocyte maturation in vitro in the absence of serum. *Biol. Reprod.*, **43**, 891–897.
- Schuel, H. (1985) Functions of egg cortical granules. In Metz, C.B. and Monroy, A. (eds), *Biology of Fertilization*, vol. 3. Academic Press, New York, pp. 1–44.
- Shabanowitz, R.B. and O'Rand, M.G. (1988) Characterization of the human zona pellucida from fertilized and unfertilized eggs. *J. Reprod. Fertil.*, **82**, 151–161.
- Shen, S.S. and Buck, W.R. (1990) A synthetic peptide of the pseudosubstrate domain of protein kinase C blocks cytoplasmic alkalization during activation of the sea urchin egg. *Dev. Biol.*, **140**, 272–280.
- Shiraishi, K., Okada, A., Shirkawa, H., Nakanishi, S., Mikoshiba, K. and Miyazaki, S. (1995) Developmental changes in the distribution of the endoplasmic reticulum and inositol 1,4,5-trisphosphate receptors and the spatial pattern of Ca<sup>2+</sup> release during maturation of hamster oocytes. *Dev. Biol.*, in press.
- Shirakawa, H. and Miyazaki, S. (1995) Evidence for inositol tetrakisphosphate-activated Ca<sup>2+</sup> influx pathway refilling inositol trisphosphate-sensitive Ca<sup>2+</sup> stores in hamster eggs. *Cell Calcium*, **17**, 1–13.
- Sousa, M. and Tesarik, J. (1994) Ultrastructural analysis of fertilization failure after intracytoplasmic sperm injection. *Hum. Reprod.*, **6**, 2374–2380.
- Steinhardt, R.A. and Alderton, J.M. (1982) Calmodulin confers calcium sensitivity on secretory exocytosis. *Nature*, **295**, 154–155.
- Steinhardt, R.A., Epel, D., Carroll, E.J. and Yanagimachi, R. (1974) Is calcium ionophore a universal activator for unfertilized eggs? *Nature*, **252**, 41–43.
- Stewart-Savage, J. and Bavister, B.D. (1991) Time course and pattern of cortical granule breakdown in hamster eggs after sperm fusion. *Mol. Reprod. Dev.*, **30**, 390–395.
- Stice, S.L. and Robl, J.M. (1990) Activation of mammalian oocytes by a factor obtained from rabbit sperm. *Mol. Reprod. Dev.*, **25**, 272–280.
- Sudhof, T.C., Newton, C.L., Archer, B.T. III, Ushkaryov, Y.A. and Mignery, G.A. (1991) Structure of a novel InsP<sub>3</sub> receptor. *EMBO J.*, **10**, 3199–3206.
- Sundstrom, P. and Nilsson, B.O. (1988) Meiotic and cytoplasmic maturation of oocytes collected in stimulated cycles is asynchronous. *Hum. Reprod.*, **3**, 613–619.
- Supattapone, S., Danoff, S.K., Theibert, A., Joseph, S., Steiner, J. and Snyder, S.H. (1988) Cyclic AMP-dependent phosphorylation of a brain inositol trisphosphate receptor decreases its release of calcium. *Proc. Natl. Acad. Sci. USA*, **85**, 8747–8750.
- Suzuki, S., Kitai, H., Tojo, R., Seki, K., Oba, M. and Fujiwara, T. (1981) Ultrastructure and some biologic properties of human oocytes and granulosa cells cultured in vitro. *Fertil. Steril.*, **35**, 142–148.
- Swann, K. (1990) A cytosolic sperm factor stimulates repetitive calcium increases and mimics fertilization in hamster eggs. *Development*, **110**, 1295–1302.
- Swann, K. (1992) Different triggers for calcium oscillations in mouse eggs involve a ryanodine-sensitive calcium store. *Biochem. J.*, **287**, 79–84.
- Swann, K. (1994) Ca<sup>2+</sup> oscillations and sensitization of Ca<sup>2+</sup> release in unfertilized mouse eggs injected with a sperm factor. *Cell Calcium*, **15**, 331–339.
- Tam, P.P.I., Loong, E.P.L. and Chiu, T.T.Y. (1990) Localization of fucosyl glycoconjugates in human oocytes following insemination for in vitro fertilization. *J. In Vitro Fertil. Embryo Transfer*, **7**, 141–145.
- Taylor, C.T., Lawrence, Y.M., Kingsland, C.R., Biljan, M.M. and Cuthbertson, K.S.R. (1993) Oscillations in intracellular free calcium induced by spermatozoa in human oocytes at fertilization. *Hum. Reprod.*, **8**, 2174–2179.
- Terasaki, M. and Sardet, C. (1991) Demonstration of calcium uptake and release by sea urchin egg cortical endoplasmic reticulum. *J. Cell Biol.*, **115**, 1031–1037.
- Tesarik, J. and Sousa, M. (1994) Comparison of Ca<sup>2+</sup> responses in human oocytes fertilized by subzonal insemination and by intracytoplasmic sperm injection. *Fertil. Steril.*, **62**, 1197–1204.
- Tesarik, J., Sousa, M. and Testart, J. (1994) Human oocyte activation after intracytoplasmic sperm injection. *Hum. Reprod.*, **9**, 511–518.
- Tombes, R.M., Simerly, C., Borisy, G.G. and Schatten, G. (1992) Meiosis, egg activation, and nuclear envelope breakdown are differentially reliant on Ca<sup>2+</sup>, whereas germinal vesicle breakdown is Ca<sup>2+</sup> independent in the mouse oocyte. *J. Cell Biol.*, **117**, 799–811.
- Trifaro, J.-M., Vitale, M.L. and Rodriguez Del Castillo, A. (1992) Cytoskeleton and molecular mechanisms in neurotransmitter release by neurosecretory cells. *Eur. J. Pharmacol.*, **225**, 83–104.
- Trimmer, J.S. and Vacquier, V.D. (1986) Activation of sea urchin gametes. *Annu. Rev. Cell Biol.*, **2**, 1–26.
- Trounson, A.O., Mohr, L.R., Wood, C. and Leeton, J.F. (1982) Effect of delayed insemination on in vitro fertilization, culture and transfer of human embryos. *J. Reprod. Fertil.*, **64**, 285–294.
- Turner, P.R. and Jaffe, L.A. (1989) G-proteins and the regulation of oocyte maturation and fertilization. In Schatten, H. and Schatten, G. (eds), *The Cell Biology of Fertilization*. Academic Press, New York, pp. 298–313.
- Usui, N. and Yanagimachi, R. (1976) Behavior of hamster sperm nuclei incorporated into eggs at various stages of maturation, fertilization and early development. *J. Ultrastr. Res.*, **57**, 276–88.
- Vacquier, V. and Payne, J.E. (1973) Methods for quantitating sea urchin sperm-egg binding. *Exp. Cell Res.*, **82**, 227–235.
- Van Blerkom, J., Davis, P.W. and Merriam, J. (1994) The developmental ability of human oocytes penetrated at the germinal vesicle stage after insemination in vitro. *Hum. Reprod.*, **9**, 697–708.
- Van de Sandt, J.J.M., Schroeder, A.C. and Eppig, J.J. (1990) Culture media for mouse oocyte maturation affect subsequent preimplantation embryo development. *Mol. Reprod. Dev.*, **25**, 164–172.
- Van Steirteghem, A.C., Liu, J., Joris, H., Nagy, Z., Janssenswillen, C., et al. (1993a) Higher success rate by intracytoplasmic sperm injection than by subzonal insertion. Report of a second series of 300 consecutive treatment cycles. *Hum. Reprod.*, **8**, 1055–1060.
- Van Steirteghem, A.C., Nagy, Z., Joris, H., Liu, J., Staessen, C., et al. (1993b) High fertilization and implantation rates after intracytoplasmic sperm injection. *Hum. Reprod.*, **8**, 1061–1066.
- Veeck, L.L. (1994) The morphological assessment of human oocytes and early concepti. In Keel, B.A. and Webster, B.W. (eds.), *CRC Handbook of the Laboratory Diagnosis and Treatment of Infertility*. CRC Press, Boca Raton, FL, pp. 353–369.
- Vitullo, A.D. and Ozil, J.-P. (1992) Repetitive calcium stimuli drive meiotic resumption and pronuclear development during mouse oocyte activation. *Dev. Biol.*, **151**, 128–136.

- Wagenknecht, T., Grassucci, R., Frank, J., Saito, A., Inui, M. and Fleischer, S. (1989) Three-dimensional architecture of the calcium channel/foot structure of sarcoplasmic reticulum. *Nature*, **338**, 167–170.
- Wassarman, P.M. (1990) Profile of a mammalian sperm receptor. *Development*, **108**, 1–17.
- Whitaker, M. and Swann, K. (1993) Lighting the fuse at fertilization. *Development*, **117**, 1–12.
- Whittingham, D. and Siracusa, G. (1978) The involvement of calcium in the activation of mammalian oocytes. *Exp. Cell Res.*, **113**, 311–317.
- Williams, C.J., Schultz, R.M. and Kopf, G.S. (1992) Role of G-proteins in mouse egg activation: stimulatory effects of acetylcholine on the ZP2 to ZP2f conversion and pronuclear formation in eggs expressing a functional m1 muscarinic receptor. *Dev. Biol.*, **151**, 288–296.
- Wolf, D.P. (1981) The mammalian egg's block to polyspermy. In Mastroianni, L. and Biggers, J.D. (eds), *Fertilization and Embryonic Development in Vitro*. Plenum, New York, pp. 183–197.
- Wolf, D.P. and Hamada, M. (1977) Induction of zonal and egg plasma membrane blocks to sperm penetration in mouse eggs with cortical granule exudate. *Biol. Reprod.*, **17**, 350–354.
- Xu, Z., Kopf, G.S. and Schultz, R.M. (1994) Involvement of inositol 1,4,5-trisphosphate-mediated  $Ca^{2+}$  release in early and late events of mouse egg activation. *Development*, **120**, 1851–1859.
- Yanagimachi, R. (1994) Mammalian fertilization. In Knobil, E. and Neill, J.D. (eds), *The Physiology of Reproduction*. Raven Press, New York.
- Yin, H.L., Janmey, P.A. and Schleicher (1990) Severin is a gelsolin prototype. *FEBS Lett.*, **264**, 78–80.
- Yoshida, M., Cran, D. and Pursel, V.G. (1993) Confocal and fluorescence microscopic study using lectins of the distribution of cortical granules during the maturation and fertilization of pig oocytes. *Mol. Reprod. Dev.*, **36**, 462–468.
- Zirkin, B.R., Perreault, S.D. and Naish, S.J. (1989) Formation and function of the male pronucleus during mammalian fertilization. In Schatten, H. and Schatten, G. (eds), *The Molecular Biology of Fertilization*. Academic Press, New York, pp. 91–114.

*Received on September 1, 1995; accepted on October 10, 1995*
